# Supplementary material for: TeachApproach: An AR Learning Platform for Intraoperative Orientation in Anterior Minimally Invasive Hip Surgery--a Feasibility Study
Source: Research Square preprint supplement (doi:10.21203/rs.3.rs-7326487/v1), 2025-10-17
Supplement: Supplementary file 1 [file 9659594719cc4c8b56426c68.docx]

# **Demographic data**

- Gender
  - female
  - male
  - other
- How many years of clinical experience do you have?
  - <1year
  - 1 year
  - 2 years
  - 3 years
  - 4 years
  - >4 years
- How many years of clinical experience do you have in the field of orthopedics/traumatology?
  - <1year
  - 1 year
  - 2 years
  - 3 years
  - 4 years
  - >4 years
- Which medical specialty is your medium-term goal?
  - Board certification in Orthopedics and Traumatology
  - Board certification in General Surgery
  - Board certification in Internal Medicine
  - Other
- I had prior experience with augmented reality before this study.
  5 point Likert scale:
  1 no experience with AR - 5 a lot of experience with AR
- Study group
  - Augmented Reality group
  - Traditional Learning group

# **General Feedback**

## **Learning Experience**

- Did the learning experience help you understand the individual steps of the hip approach?
  Scale: 1 = not at all - 10 Completely true
- The learning materials were sufficiently detailed, and I had all the necessary information at each step.
  Scale: 1 = not at all - 10 Completely true
- The learning experience motivated me to learn more about surgery.
  Scale: 1 = not at all - 10 Completely true
- I would recommend the learning materials for use in surgical training.
  Scale: 1 = not at all - 10 Completely true

## **Usability**

- How satisfied are you with the learning materials?
  Scale: 1 = not at all - 10 Completely satisfied
- Were you able to successfully perform the surgical approach?
  - yes
  - no
- The learning method was a helpful guide for identifying key anatomical landmarks.
  Scale: 1 = not at all - 10 Completely true
- Would you have hoped for additional support from the learning method?
  - no
  - difficult to tell
  - yes
- I was able to orient myself within the surgical field at all times.
  Scale: 1 = not at all - 10 Completely true
- If not applicable: During which steps were you unable to orient yourself?
  open answer
- What bothered you while using the learning method?
  open answer

## **General Assessments on Augmented Reality in Surgery**

- Augmented Reality applications are the future of surgery.
  Scale: 1 = not at all - 10 Completely true
- New technologies improve surgical teaching.
  Scale: 1 = not at all - 10 Completely true

## **General Feedback**

- Name three things you particularly liked about the learning method.
  open answer
- Name three suggestions for improving the learning method.
  open answer

# **NASA Task Load Index**

1. How mentally demanding was the task during the study?

20-point Likert scale:
Scale: 1 = not at all - 20 Very demanding

1. How physically demanding was the task during the study?
   20-point Likert scale:
   1 not at all - 20 Very demanding
2. How pressured did you feel regarding time while performing the task?
   20-point Likert scale:
   1 not at all - 20 very Pressured
3. How successful were you in accomplishing the task?
   20-point Likert scale:
   1 not at all - 20 very successful
4. How hard did you have to work to achieve your level of performance?
   20-point Likert scale:
   1 not at all - 20 very hard
5. How uncertain, discouraged, irritated, stressed, or annoyed did you feel?
   20-point Likert scale:
   1 not at all - 20 very much

# **System Usability Scale (SUS)**


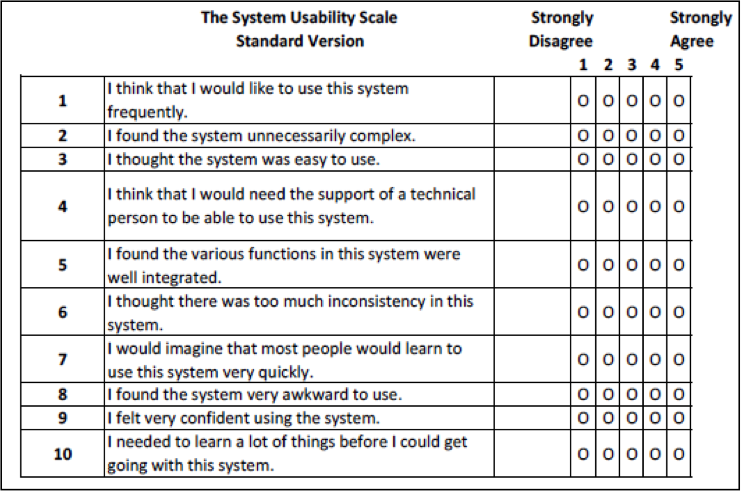


# **Augmented Reality Immersion (ARI) questionnaire**

1. I liked the activity because it was novel.
   7 point Likert scale:
   1 not at all - 7 very true
2. I liked the type of the activity.
   7 point Likert scale:
   1 not at all - 7 very true
3. I wanted to spend the time to complete the activity successfully.
   7 point Likert scale:
   1 not at all - 7 very true
4. I wanted to spend time to participate in the activity.
   7 point Likert scale:
   1 not at all - 7 very true
5. It was easy for me to use the AR application.
   7 point Likert scale:
   1 not at all - 7 very true
6. I found the AR application confusing.
   7 point Likert scale:
   1 not at all - 7 very true
7. The AR application was unnecessarily complex.
   7 point Likert scale:
   1 not at all - 7 very true
8. I did not have difficulties in controlling the AR application.
   7 point Likert scale:
   1 not at all - 7 very true
9. I was curious about how the activity would progress.
   7 point Likert scale:
   1 not at all - 7 very true
10. I was often excited because I felt as being part of the activity.
    7 point Likert scale:
    1 not at all - 7 very true
11. I often felt suspense by the activity.
    7 point Likert scale:
    1 not at all - 7 very true
12. If interrupted, I looked forward to returning to the activity.
    7 point Likert scale:
    1 not at all - 7 very true
13. Everyday thoughts and concerns faded out during the activity.
    7 point Likert scale:
    1 not at all - 7 very true
14. I was more focused on the activity rather than on any external distractions.
    7 point Likert scale:
    1 not at all - 7 very true
15. I didn’t have any irrelevant thoughts or external distractions during the activity.
    7 point Likert scale:
    1 not at all - 7 very true
16. The activity became the unique and only thought occupying my mind.
    7 point Likert scale:
    1 not at all - 7 very true
17. I lost track of time, as if everything just stopped, and the only thing that I could think about was the activity.
    7 point Likert scale:
    1 not at all - 7 very true

# **Technology Acceptance Model (TAM) questionnaire**

1. Assuming I had access to this AR learning method, I would intend to use it.
   10 point likert scale:
   1 not at all - 10 very true
2. If I had access to this AR learning method, I predict I would use it.
   10 point likert scale:
   1 not at all - 10 very true
3. Using the AR learning method would enhance my effectiveness in my job.
   10 point likert scale:
   1 not at all - 10 very true
4. Using the AR learning method would improve my productivity.
   10 point likert scale:
   1 not at all - 10 very true
5. Using the AR learning method would enhance my effectiveness in my job
   10 point likert scale:
   1 not at all - 10 very true
6. I would find the AR learning method useful in my job.
   10 point likert scale:
   1 not at all - 10 very true
7. Learning to operate the AR learning method would be easy for me.
   10 point likert scale:
   1 not at all - 10 very true
8. I would find it easy to get the AR learning method to do what I want it to do.
   10 point likert scale:
   1 not at all - 10 very true
9. I would find the AR learning method easy to use.
   10 point likert scale:
   1 not at all - 10 very true
10. It would be easy for me to become skillful in the use of the technology.
    10 point likert scale:
    1 not at all - 10 very true

##

# **Objective Structured Assessment of Technical Skills (OSATS)**

**Completed by the attending surgeon**

## **Part 1. Checklist**

1. Palpates the anterior superior iliac spine.
   - yes
   - no
2. Places marking and skin incision in the correct location.
   - yes
   - no
3. Performs hemostasis correctly.
   - yes
   - no
4. Correctly exposes the tensor fascia.
   - yes
   - no
5. Performs longitudinal incision of the tensor fascia in the correct location.
   - yes
   - no
6. Mobilizes the tensor correctly with Langenbeck retractor.
   - yes
   - no
7. Places retractor correctly.
   - yes
   - no
8. Correctly exposes the deep muscle layer (rectus femoris visible).
   - yes
   - no
9. Places deep retractor correctly.
   - yes
   - no
10. Ligates arteries correctly.
    - yes
    - no
11. Correctly exposes the joint capsule.
    - yes
    - no
12. Incises the joint capsule correctly.
    - yes
    - no
13. Uses appropriate surgical instruments for dissection and maintaining exposure.
    - yes
    - no
14. Incisions are appropriate in depth and length.
    - yes
    - no
15. Vulnerable structures such as nerves and blood vessels are properly protected, and no structures outside the surgical approach were injured.
    - yes
    - no

## **Part 2. Global rating Scale (GRS)**

1. Tissue Handling
   5-point Likert scale
   1 Frequently uses unnecessary force or causes damage due to incorrect instrument use.
   3 Generally careful handling of tissue, but some unintentional damage.
   5 Consistently good tissue handling with minimal damage.
2. Time and Motion
   5-point Likert scale
   1 Many unnecessary movements
   3 Generally efficient use of time and motion, but with some unnecessary movements
   5 Good economy of movement with maximum efficiency.
3. Instrument Handling
   5-point Likert scale
   1 Repeatedly clumsy or hesitant instrument use.
   3 Competent use of instruments, though sometimes a bit stiff or awkward.
   5 Smooth instrument use without clumsiness.
4. Knowledge of Instruments
   5-point Likert scale
   1 Repeatedly asks for the wrong instruments or uses inappropriate tools.
   3 Knows the names of most instruments and uses appropriate tools for the task.
   5 Clearly familiar with instruments and their names.
5. Use of Assistance
   5-point Likert scale
   1 Assistant's hands are consistently poorly placed.
   3 Generally good use of the assistant.
   5 Strategically and effectively uses assistance throughout.

## **Part 3. Overall Performance**

1. How often did the senior surgeon need to intervene?
   open answer
2. Duration of learning?
   open answer rounded to minutes
3. Duration of the operation?
   open answer in minutes and seconds
4. Did the participant successfully complete the task?
   - yes
   - no
5. Assuming the anterior hip approach is an EPA (Entrustable Professional Activity), what level of supervision would the participant require after this study?
   - Participant should only observe
   - Direct supervision (Supervisor present in the room)
   - Supervision on demand (Supervisor on call)
   - No supervision needed
   - Participant supervises others
6. Any additional remarks?
